# Supplementary material for: Genome-Wide Data-Mining of Candidate Human Splice Translational Efficiency Polymorphisms (STEPs) and an Online Database
Source: PLOS journal article supplement (doi:10.1371/journal.pone.0013340), 2010-10-11
Supplement: S1 (10.1371/journal.pone.0013340.s001) [file journal.pone.0013340.s001]

**Table S1:** Annotations made on transcript introns.

| Annotation            | Details                                                                                                                     |
|-----------------------|-----------------------------------------------------------------------------------------------------------------------------|
| Candidate ESE Count   | Counts the total number of candidate Exonic Splicing Enhancer hexamers in exon sequences.                                   |
| G triplet count       | Counts the number of "GGG" sequences - a putative intronic splicing enhancer (ISE) - in an intron.                          |
| G triplet pairs count | Counts the number of "GGG" sequence pairs of 0 to 4 nucleotides apart in an intron.                                         |
| Polypyrimidine Tract  | Records the sequence, length and percentage of pyrimidines between 3' intron end and the Branch Point.                      |
| GC %                  | Records the percentage of nucleotides that are C or G in an intron.                                                         |
| 5' Splice Site        | Records the 6 base sequence at the 5' end of an intron and whether it matches the consensus GTRAGT.                         |
| 3' Splice Site        | Records the 3 base sequence at the 3' end of an intron and whether it matches the consensus YAG.                            |
| Branch Point          | Records, where matching consensus YTN <u>A</u> Y, a sequence of 5 nucleotides between 21 and 34 bases of the 3' intron end. |
