# Supplementary material for: Genome-Wide Data-Mining of Candidate Human Splice Translational Efficiency Polymorphisms (STEPs) and an Online Database
Source: PLOS journal article supplement (doi:10.1371/journal.pone.0013340), 2010-10-11
Supplement: S2 (10.1371/journal.pone.0013340.s002) [file journal.pone.0013340.s002]

**Table S2:** Scoring matrix for 5' donor splice sites based on matrices from Zhang *et al.* (1998), where 1 is the first base of the intron and the scores are the probability of a base not appearing at a position.

| Low GC Introns (under 50%) | 1    | 2    | 3    | 4    | 5    | 6    |
|----------------------------|------|------|------|------|------|------|
| A                          | 1.00 | 1.00 | 0.29 | 0.27 | 0.89 | 0.79 |
| C                          | 1.00 | 1.00 | 0.98 | 0.94 | 0.94 | 0.90 |
| G                          | 0.00 | 1.00 | 0.76 | 0.92 | 0.25 | 0.86 |
| T                          | 1.00 | 0.00 | 0.97 | 0.87 | 0.92 | 0.45 |
| High GC Introns (over 50%) | 1    | 2    | 3    | 4    | 5    | 6    |
| A                          | 1.00 | 1.00 | 0.62 | 0.30 | 0.95 | 0.87 |
| C                          | 1.00 | 1.00 | 0.96 | 0.91 | 0.95 | 0.79 |
| G                          | 0.00 | 1.00 | 0.44 | 0.86 | 0.14 | 0.75 |
| T                          | 1.00 | 0.00 | 0.98 | 0.93 | 0.96 | 0.59 |
