# Supplementary material for: Genome-Wide Data-Mining of Candidate Human Splice Translational Efficiency Polymorphisms (STEPs) and an Online Database
Source: PLOS journal article supplement (doi:10.1371/journal.pone.0013340), 2010-10-11
Supplement: S4 (10.1371/journal.pone.0013340.s004) [file journal.pone.0013340.s004]

**Table S4:** Scoring matrix for branch points based on matrices from Gao *et al.* (2008), where 0 is the location of the branch point and the scores are the probability of a base not appearing at a position.

|   | -5    | -4    | -3    | -2    | -1    | 0     | 1     | 2     | 3     |
|---|-------|-------|-------|-------|-------|-------|-------|-------|-------|
| A | 0.746 | 0.768 | 0.917 | 0.934 | 0.834 | 0.077 | 0.818 | 0.698 | 0.799 |
| C | 0.790 | 0.773 | 0.530 | 0.840 | 0.552 | 0.967 | 0.669 | 0.726 | 0.609 |
| G | 0.746 | 0.807 | 0.873 | 0.972 | 0.823 | 0.983 | 0.934 | 0.888 | 0.888 |
| T | 0.718 | 0.652 | 0.680 | 0.254 | 0.790 | 0.972 | 0.580 | 0.687 | 0.704 |
